# Supplementary material for: Attention-Dependent Physiological Correlates in Sleep-Deprived Young Healthy Humans
Source: MDPI journal article supplement (doi:10.3390/bs11020022), 2021-02-05
Supplement: s1 [file s1]

## DESCRIPTIVE AND INFERENTIAL STATISTICS FOR BETWEEN CONDITIONS INDICES

**Table S1: Attentional Network task**

| Attentional Network Task indices | Condition | m ± s.e.     | Δ (m ± s.e.) | Sum of positive ranks | p-value* | Effect size |
|----------------------------------|-----------|--------------|--------------|-----------------------|----------|-------------|
| ANT Alerting                     | B         | 24.4 ± 5.08  | 8.38 ± 6.82  | 81                    | .233     | -0.21       |
|                                  | D         | 32.8 ± 5.89  |              |                       |          |             |
| ANT Orienting                    | B         | 38.9 ± 5.43  | 4.2 ± 5.7    | 73                    | .460     | -0.134      |
|                                  | D         | 43.16 ± 8.41 |              |                       |          |             |
| ANT Conflict                     | B         | 90.5 ± 6.15  | -5.4 ± 7.3   | 49                    | .532     | -0.114      |
|                                  | D         | 85.09 ± 5.89 |              |                       |          |             |

B=baseline condition D=sleep deprived condition; Δ= D-B; \*Wilcoxon signed rank test.

**Table S2 - Continuous Compensatory Tracker**

| Continuous Compensatory Tracker (CCT) indices# | Condition | m ± s.e.       | Δ (m ± s.e.)   | Sum of positive ranks | p-value* | Effect size |
|------------------------------------------------|-----------|----------------|----------------|-----------------------|----------|-------------|
| CTT Speed                                      | B         | -0.05 ± 0.166  | -0.02 ± 0.34   | 46                    | .426     | -0.14       |
|                                                | D         | -0.08 ± 0.33   |                |                       |          |             |
| CTT deviation                                  | B         | -1.16 ± 0.67   | -11.16 ± 11.52 | 67                    | .69      | -0.07       |
|                                                | D         | -12.33 ± 11.41 |                |                       |          |             |

# changes from the beginning (T1) to the end (T8) of the task; B=baseline condition. D=sleep deprived condition; Δ= D-B; \* Wilcoxon signed rank test.

Table S3 - Physiological parameters recorded during the Attentional Network Task

| Physiological parameters <sup>#</sup> | Condition | m ± s.e.       | Δ (m ± s.e.)   | Sum of positive ranks | p-value* | Effect size |
|---------------------------------------|-----------|----------------|----------------|-----------------------|----------|-------------|
| zfT                                   | B         | 0.061 ± 0.02   | 0.03 ± 0.03    | 68.5                  | .315     | -0.18       |
|                                       | D         | 0.092 ± 0.035  |                |                       |          |             |
| MaxT                                  | B         | 0.26 ± 0.035   | 0.048 ± 0.040  | 59.5                  | .327     | -0.17       |
|                                       | D         | 0.31 ± 0.03    |                |                       |          |             |
| HR                                    | B         | -0.005 ± 0.13  | -0.002 ± 0.013 | 58                    | .910     | -0.02       |
|                                       | D         | -0.007 ± 0.007 |                |                       |          |             |
| HMA                                   | B         | 0.12 ± 0.58    | 1.87 ± 1.11    | 81                    | .233     | -0.21       |
|                                       | D         | 1.99 ± 0.88    |                |                       |          |             |

<sup>#</sup> for each measure, the changes from the beginning of the task (average of the measure over the first tenth of its time series) to its end (average of the measure over the last tenth of its time series) were considered, B=baseline condition. D=sleep deprived condition; Δ= D-B; \* Wilcoxon signed rank test.

Table S4 - Physiological parameters recorded during the Continuous Compensatory Tracker

| Physiological parameters <sup>#</sup> | Condition | m ± s.e.       | Δ (m ± s.e.)   | Sum of positive ranks | p-value* | Effect size |
|---------------------------------------|-----------|----------------|----------------|-----------------------|----------|-------------|
| zfT                                   | B         | 0.02 ± 0.016   | 0.008 ± 0.18   | 61.5                  | .932     | -0.01       |
|                                       | D         | 0.034 ± 0.013  |                |                       |          |             |
| MaxT                                  | B         | 0.09 ± 0.01    | -0.001 ± 0.014 | 35.5                  | .783     | -0.05       |
|                                       | D         | 0.09 ± 0.02    |                |                       |          |             |
| HR                                    | B         | -0.006 ± 0.01  | -0.016 ± 0.017 | 48                    | .496     | -0.124      |
|                                       | D         | -0.023 ± 0.009 |                |                       |          |             |
| HMA                                   | B         | -3.56 ± 2.68   | 4.83 ± 3.08    | 82                    | .211     | -0.228      |
|                                       | D         | 1.27 ± 1.26    |                |                       |          |             |

<sup>#</sup> for each measure, the changes from the beginning of the task (average of the measure over the first tenth of its time series) to its end (average of the measure over the last tenth of its time series) were considered, <sup>1</sup> B=baseline condition. D=sleep deprived condition; Δ= D-B; \* Wilcoxon signed rank test.
